# Supplementary material for: Spasmolytic Effect of Caulerpine Involves Blockade of Ca2+ Influx on Guinea Pig Ileum
Source: MDPI journal article supplement (doi:10.3390/md11051553), 2013-05-13
Supplement: s1 [file s1]

marinedrugs-11-01553-s001.mol
  corina  04151403233D 1   1.00000     0.00000 
CORINA 3.49 0023  12.04.2013
 32 36  0  0  0  0  0  0  0  0999 V2000
   -0.0022    1.4054    0.1900 C   0  0  0  0  0  0  0  0  0  0  0  0
    0.0217    0.0020    0.2520 C   0  0  0  0  0  0  0  0  0  0  0  0
    1.0038   -0.9905    0.1654 C   0  0  0  0  0  0  0  0  0  0  0  0
    2.3894   -1.0004   -0.0216 C   0  0  0  0  0  0  0  0  0  0  0  0
    3.4155    0.0390   -0.2090 C   0  0  0  0  0  0  0  0  0  0  0  0
    3.3915    1.4424   -0.2715 C   0  0  0  0  0  0  0  0  0  0  0  0
    2.4094    2.4349   -0.1852 C   0  0  0  0  0  0  0  0  0  0  0  0
    1.0240    2.4448    0.0030 C   0  0  0  0  0  0  0  0  0  0  0  0
   -1.2842    1.8277    0.3503 N   0  0  0  0  0  0  0  0  0  0  0  0
   -2.1371    0.7499    0.5202 C   0  0  0  0  0  0  0  0  0  0  0  0
   -1.3730   -0.4267    0.4610 C   0  0  0  0  0  0  0  0  0  0  0  0
   -3.5101    0.6595    0.7176 C   0  0  0  0  0  0  0  0  0  0  0  0
   -4.1073   -0.5758    0.8599 C   0  0  0  0  0  0  0  0  0  0  0  0
   -3.3504   -1.7361    0.8081 C   0  0  0  0  0  0  0  0  0  0  0  0
   -1.9883   -1.6678    0.6037 C   0  0  0  0  0  0  0  0  0  0  0  0
    4.6985   -0.3829   -0.3626 N   0  0  0  0  0  0  0  0  0  0  0  0
    5.5519    0.6951   -0.5285 C   0  0  0  0  0  0  0  0  0  0  0  0
    4.7863    1.8712   -0.4801 C   0  0  0  0  0  0  0  0  0  0  0  0
    6.9260    0.7859   -0.7180 C   0  0  0  0  0  0  0  0  0  0  0  0
    7.5237    2.0214   -0.8563 C   0  0  0  0  0  0  0  0  0  0  0  0
    6.7663    3.1815   -0.8083 C   0  0  0  0  0  0  0  0  0  0  0  0
    5.4018    3.1123   -0.6214 C   0  0  0  0  0  0  0  0  0  0  0  0
    2.9287   -2.3071   -0.0331 C   0  0  0  0  0  0  0  0  0  0  0  0
    3.5158   -2.7321    0.9455 O   0  0  0  0  0  0  0  0  0  0  0  0
    4.9781   -1.3118   -0.3566 H   0  0  0  0  0  0  0  0  0  0  0  0
    2.7926   -3.0842   -1.1292 O   0  0  0  0  0  0  0  0  0  0  0  0
    3.3621   -4.3935   -1.0710 C   0  0  0  0  0  0  0  0  0  0  0  0
    0.4846    3.7515    0.0135 C   0  0  0  0  0  0  0  0  0  0  0  0
    0.2716    4.4035   -1.1499 O   0  0  0  0  0  0  0  0  0  0  0  0
   -0.2757    5.7208   -1.0645 C   0  0  0  0  0  0  0  0  0  0  0  0
    0.2120    4.2892    1.0716 O   0  0  0  0  0  0  0  0  0  0  0  0
   -1.5635    2.7566    0.3465 H   0  0  0  0  0  0  0  0  0  0  0  0
  1  2  2  0      
  2  3  1  0      
  3  4  2  0      
  4  5  1  0      
  5  6  2  0      
  6  7  1  0      
  7  8  2  0      
  8  1  1  0      
  1  9  1  0      
  9 10  1  0      
 10 11  2  0      
 11  2  1  0      
 10 12  1  0      
 12 13  2  0      
 13 14  1  0      
 14 15  2  0      
 15 11  1  0      
  5 16  1  0      
 16 17  1  0      
 17 18  2  0      
 18  6  1  0      
 17 19  1  0      
 19 20  2  0      
 20 21  1  0      
 21 22  2  0      
 22 18  1  0      
  4 23  1  0      
 23 24  2  0      
 25 16  1  0      
 23 26  1  0      
 26 27  1  0      
  8 28  1  0      
 28 29  1  0      
 29 30  1  0      
 28 31  2  0      
  9 32  1  0      
M  END
$$$$
