# Supplementary material for: Spasmolytic Effect of Caulerpine Involves Blockade of Ca2+ Influx on Guinea Pig Ileum
Source: MDPI journal article supplement (doi:10.3390/md11051553), 2013-05-13
Supplement: s2 [file s2]

marinedrugs-11-01553-s001.mol
  ChemDraw02251409302D

 32 36  0  0  0  0  0  0  0  0999 V2000
   -0.9959    0.4537    0.0000 C   0  0  0  0  0  0  0  0  0  0  0  0
   -0.9959   -0.3713    0.0000 C   0  0  0  0  0  0  0  0  0  0  0  0
   -0.4125   -0.9547    0.0000 C   0  0  0  0  0  0  0  0  0  0  0  0
    0.4125   -0.9547    0.0000 C   0  0  0  0  0  0  0  0  0  0  0  0
    0.9959   -0.3713    0.0000 C   0  0  0  0  0  0  0  0  0  0  0  0
    0.9959    0.4537    0.0000 C   0  0  0  0  0  0  0  0  0  0  0  0
    0.4125    1.0371    0.0000 C   0  0  0  0  0  0  0  0  0  0  0  0
   -0.4125    1.0371    0.0000 C   0  0  0  0  0  0  0  0  0  0  0  0
   -1.7805    0.7086    0.0000 N   0  0  0  0  0  0  0  0  0  0  0  0
   -2.2654    0.0412    0.0000 C   0  0  0  0  0  0  0  0  0  0  0  0
   -1.7805   -0.6262    0.0000 C   0  0  0  0  0  0  0  0  0  0  0  0
   -3.0859   -0.0450    0.0000 C   0  0  0  0  0  0  0  0  0  0  0  0
   -3.4214   -0.7987    0.0000 C   0  0  0  0  0  0  0  0  0  0  0  0
   -2.9365   -1.4661    0.0000 C   0  0  0  0  0  0  0  0  0  0  0  0
   -2.1160   -1.3799    0.0000 C   0  0  0  0  0  0  0  0  0  0  0  0
    1.7805   -0.6262    0.0000 N   0  0  0  0  0  0  0  0  0  0  0  0
    2.2654    0.0412    0.0000 C   0  0  0  0  0  0  0  0  0  0  0  0
    1.7805    0.7086    0.0000 C   0  0  0  0  0  0  0  0  0  0  0  0
    3.0859    0.1274    0.0000 C   0  0  0  0  0  0  0  0  0  0  0  0
    3.4214    0.8811    0.0000 C   0  0  0  0  0  0  0  0  0  0  0  0
    2.9365    1.5486    0.0000 C   0  0  0  0  0  0  0  0  0  0  0  0
    2.1160    1.4623    0.0000 C   0  0  0  0  0  0  0  0  0  0  0  0
    0.6260   -1.7515    0.0000 C   0  0  0  0  0  0  0  0  0  0  0  0
    1.4229   -1.9651    0.0000 O   0  0  0  0  0  0  0  0  0  0  0  0
    2.0063   -1.3817    0.0000 H   0  0  0  0  0  0  0  0  0  0  0  0
    0.0427   -2.3349    0.0000 O   0  0  0  0  0  0  0  0  0  0  0  0
   -0.7542   -2.1214    0.0000 C   0  0  0  0  0  0  0  0  0  0  0  0
   -0.8250    1.7515    0.0000 C   0  0  0  0  0  0  0  0  0  0  0  0
   -0.2416    2.3349    0.0000 O   0  0  0  0  0  0  0  0  0  0  0  0
    0.5553    2.1214    0.0000 C   0  0  0  0  0  0  0  0  0  0  0  0
   -1.6219    1.9651    0.0000 O   0  0  0  0  0  0  0  0  0  0  0  0
   -1.9940    1.5055    0.0000 H   0  0  0  0  0  0  0  0  0  0  0  0
  1  2  2  0      
  2  3  1  0      
  3  4  2  0      
  4  5  1  0      
  5  6  2  0      
  6  7  1  0      
  7  8  2  0      
  8  1  1  0      
  1  9  1  0      
  9 10  1  0      
 10 11  2  0      
 11  2  1  0      
 10 12  1  0      
 12 13  2  0      
 13 14  1  0      
 14 15  2  0      
 15 11  1  0      
  5 16  1  0      
 16 17  1  0      
 17 18  2  0      
 18  6  1  0      
 17 19  1  0      
 19 20  2  0      
 20 21  1  0      
 21 22  2  0      
 22 18  1  0      
  4 23  1  0      
 23 24  2  0      
 25 16  1  0      
 23 26  1  0      
 26 27  1  0      
  8 28  1  0      
 28 29  1  0      
 29 30  1  0      
 28 31  2  0      
  9 32  1  0      
M  END
